# Supplementary material for: Seasonal diet composition of migrating red deer (Cervus elaphus) in temperate forests of the Western Carpathians
Source: Research Square preprint supplement (doi:10.21203/rs.3.rs-6198820/v1), 2025-04-03
Supplement: Supplementary file 1 [file c4a15fe6c715d8720572f9c2.docx]

**SUPPLEMENTARY MATERIAL**

*Table S1.* Mean values of the environmental factors (± SE) affecting red deer diet composition during summer 2014 and winter 2016 at low (<700 m a.s.l.) and high (>700 m a.s.l.) elevations in the Western Carpathians, Slovakia.

| Environm. factor | Overall | | Low elevations | | High elevations | |
| --- | --- | --- | --- | --- | --- | --- |
| Summer | Winter | Summer | Winter | Summer | Winter |
| GRASSES | 84.08 ± 10.98 | 1.83 ± 0.20 | 67.02 ± 6.73 | 2.84 ± 0.36 | 101.14 ± 20.74 | 0.93 ± 0.10 |
| CONCENTR | 141.7 ± 8.0 | 122.0 ± 7.8 | 145.7 ± 10.4 | 168.5 ± 11.3 | 137.8 ± 12.1 | 81.1 ± 7.6 |
| HFI | 0.12 ± 0.01 | 0.11 ± 0.01 | 0.14 ± 0.02 | 0.16 ± 0.01 | 0.09 ± 0.01 | 0.07 ± 0.01 |
| PREDATION | 0.24 ± 0.01 | 0.25 ± 0.01 | 0.19 ± 0.01 | 0.22 ± 0.01 | 0.29 ± 0.01 | 0.27 ± 0.01 |
| DENSITY | 10.54 ± 0.92 | 9.65 ± 0.50 | 4.38 ± 0.28 | 8.48 ± 0.58 | 16.70 ± 1.38 | 10.68 ± 0.77 |

**Note: Description of the environmental factors is provided in the main text Table 1.*

*Table S2.* Seasonal mean percentage of volume (± SE) of individual dietary items consumed by red deer at low (<700 m a.s.l.) and high (>700 m a.s.l.) in the Western Carpathians, Slovakia during 2014 – 2016.

| Dietary item | Overall | | Low elevations | | High elevations | |
| --- | --- | --- | --- | --- | --- | --- |
| Summer | Winter | Summer | Winter | Summer | Winter |
| Grasses | 35.30 ± 2.11 | 24.02 ± 2.16 | 22.32 ± 1.60 | 36.52 ± 3.65 | 48.28 ± 2.99 | 13.00 ± 1.38 |
| Herbaceous | 27.20 ± 1.57 | 6.22 ± 0.70 | 35.44 ± 1.95 | 5.88 ± 0.98 | 18.95 ± 1.88 | 6.52 ± 0.99 |
| Rubus spp. | 10.63 ± 1.02 | 17.19 ± 1.97 | 12.99 ± 1.45 | 12.82 ± 2.52 | 8.28 ± 1.37 | 21.04 ± 2.88 |
| Ferns | 8.08 ± 1.08 | 3.30 ± 0.57 | 4.52 ± 0.84 | 0.70 ± 0.14 | 11.63 ± 1.88 | 5.59 ± 0.98 |
| Broadleaf | 7.06 ± 0.75 | 8.15 ± 0.89 | 9.87 ± 1.27 | 10.03 ± 1.46 | 4.25 ± 0.60 | 6.49 ± 1.05 |
| Coniferous | 0.03 ± 0.02 | 13.03 ± 1.39 | 0.01 ± 0.01 | 6.32 ± 1.34 | 0.05 ± 0.03 | 18.95 ± 2.06 |
| Wood & bark | 8.76 ± 0.62 | 20.47 ± 1.42 | 12.05 ± 0.88 | 18.22 ± 1.91 | 5.47 ± 0.62 | 22.45 ± 2.05 |
| Fruits & seed | 2.94 ± 0.36 | 7.60 ± 1.00 | 2.80 ± 0.48 | 9.50 ± 1.83 | 3.08 ± 0.54 | 5.93 ± 0.95 |
